# Supplementary material for: Self-supported N-doped carbon-coupled Ni–Co binary nanoparticle electrodes derived from bionic design of wood cell walls for durable overall water splitting
Source: Royal Society of Chemistry journal article supplement (doi:10.1039/d4ta06772j), 2024-01-01
Supplement: d4ta06772j1.pdf [file d4ta06772j1.pdf]

**Supporting information for**  
**Self-supported N-doped Carbon-coupled Ni-Co Binary Nanoparticles**  
**Electrodes Derived from Bionic Design of Wood Cell Wall for**  
**Durable Overall Water Splitting**

Congcong Yang<sup>#a</sup>, Ruixi Jin<sup>#a</sup>, Zhihang Liu<sup>a</sup>, Shilei Li<sup>a</sup>, Dong Lv<sup>a</sup>, Jingshuo Liu<sup>a</sup>,  
Jian Li<sup>a</sup>, Zhiqun Lin<sup>\*b</sup>, Likun Gao<sup>\*a</sup>

a. Key Laboratory of Bio-based Material Science & Technology, Ministry of Education, Northeast Forestry University, Harbin 150040, PR China

b. Department of Chemical and Biomolecular Engineering, National University of Singapore, Singapore 117585

<sup>#</sup>These authors contributed equally: Congcong Yang and Ruixi Jin.

<sup>\*</sup>Corresponding Authors: Likun Gao ([gaolk@nefu.edu.cn](mailto:gaolk@nefu.edu.cn)) and Zhiqun Lin ([z.lin@nus.edu.sg](mailto:z.lin@nus.edu.sg)).

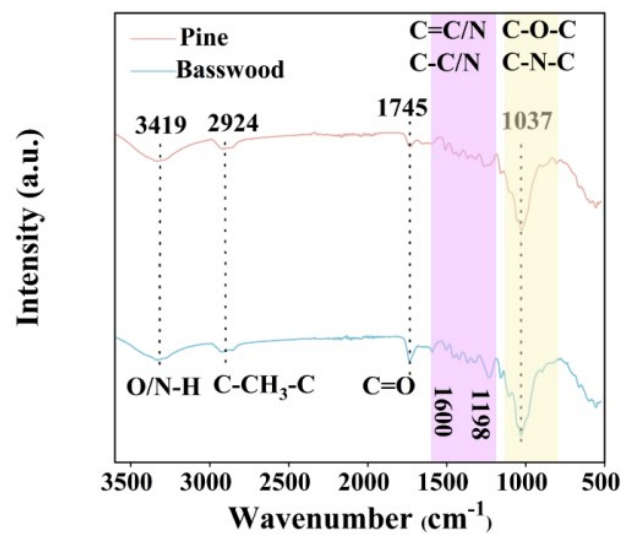

Fig. S1 FT-IR spectra of *Basswood* and *Pine*.

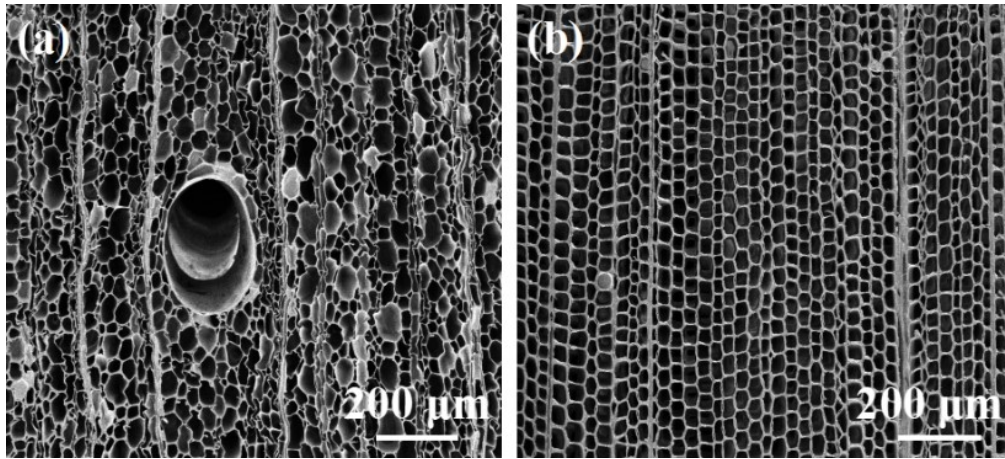

Fig. S2 SEM image of (a) untreated *Basswood* and (b) untreated *Pine* wood.

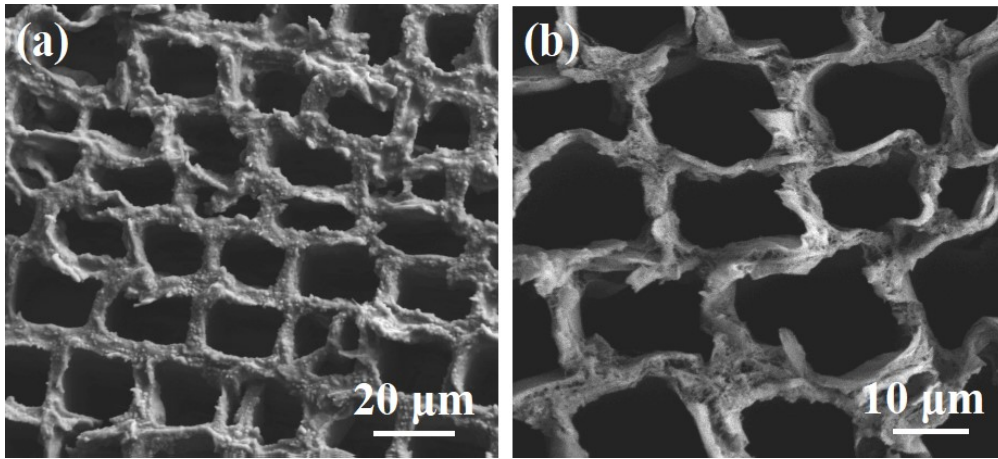

Fig. S3 SEM images of (a) *Pine* wood after treated with  $\text{Co}^{2+}$ ,  $\text{Ni}^{2+}$  and polydopamine, and (b) Ni-Co/N@CW<sub>p</sub>.

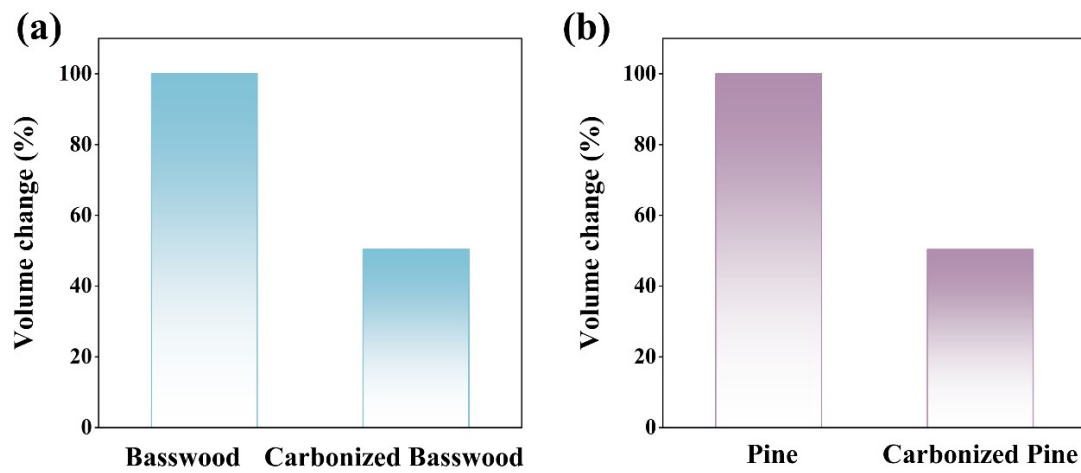

Fig. S4 The volume changes of (a) *Basswood* and (b) *Pine* before and after high-temperature calcination.

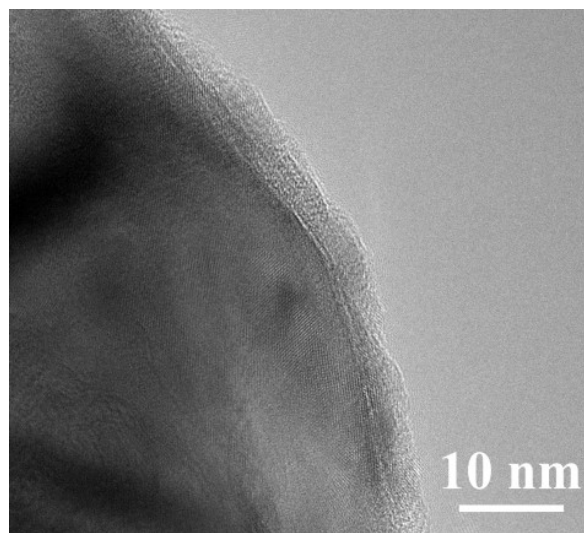

Fig. S5 High-resolution transmission electron microscope (HR-TEM) image of Ni-Co@CW<sub>B</sub>.

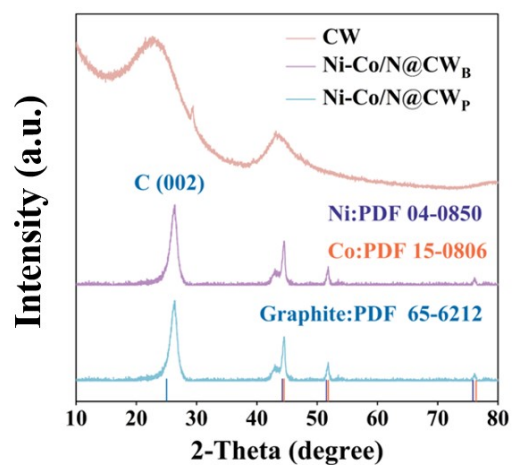

Fig. S6 XRD patterns of Ni-Co/N@CW<sub>B</sub>, Ni-Co/N@CW<sub>P</sub>, and carbonized wood.

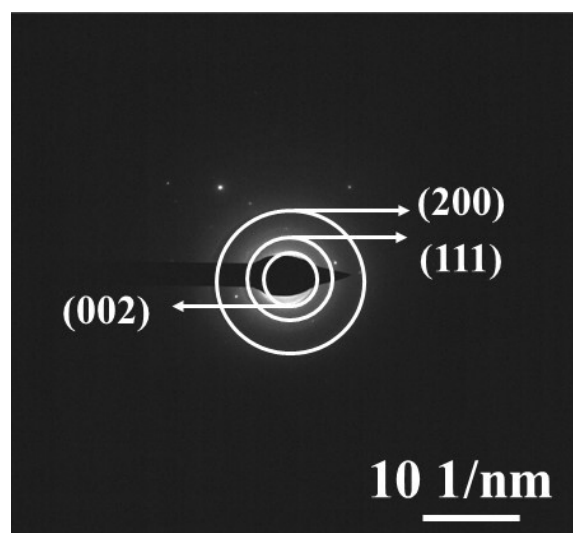

Fig. S7 The SAED pattern taken from the Ni-Co/N@CW<sub>B</sub>.



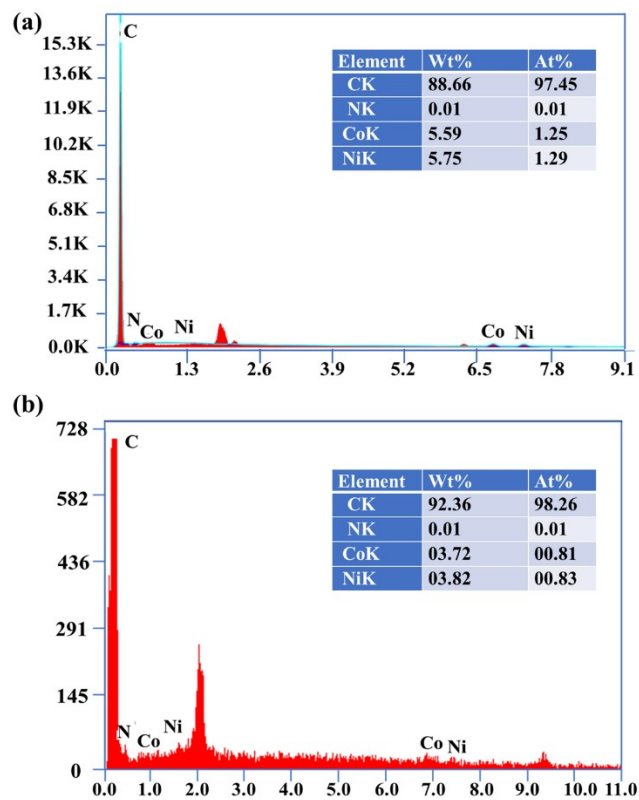

Fig. S8 EDX spectra of (a) Ni-Co/N@CW<sub>B</sub>, and (b) Ni-Co/N@CW<sub>P</sub>.

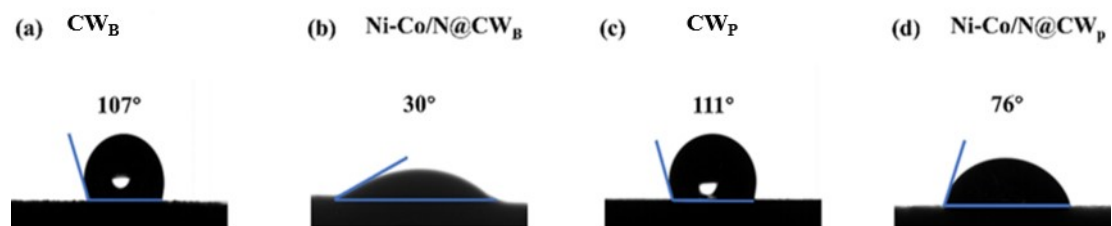

Fig. S9 Optical observation of contact angles of water droplets on the surfaces of (a) the  $CW_B$ , (b)  $Ni-Co/N@CW_B$ , (c)  $CW_P$ , and (d)  $Ni-Co/N@CW_P$ .

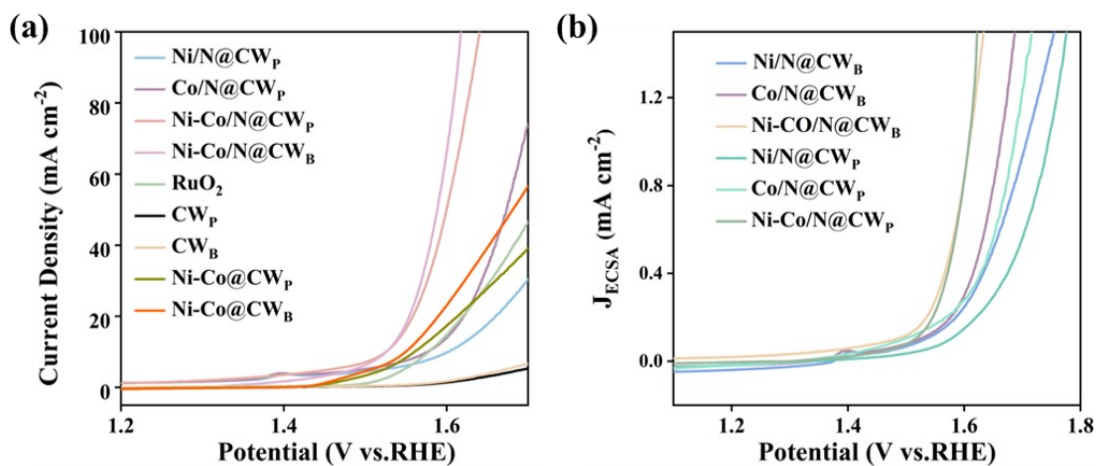

Fig. S10 (a) LSV curves for OER on CW<sub>B</sub>, CW<sub>P</sub>, Ni/N@CW<sub>B</sub>, Ni/N@CW<sub>P</sub>, Co/N@CW<sub>B</sub>, Co/N@CW<sub>P</sub>, Ni-Co@CW<sub>B</sub>, Ni-Co@CW<sub>P</sub>, Ni-Co/N@CW<sub>B</sub>, Ni-Co/N@CW<sub>P</sub>, and RuO<sub>2</sub>. (b) LSV curves for OER on Ni/N@CW<sub>B</sub>, Ni/N@CW<sub>P</sub>, Co/N@CW<sub>B</sub>, Co/N@CW<sub>P</sub>, Ni-Co/N@CW<sub>B</sub>, and Ni-Co/N@CW<sub>P</sub> by normalizing to the ECSA.

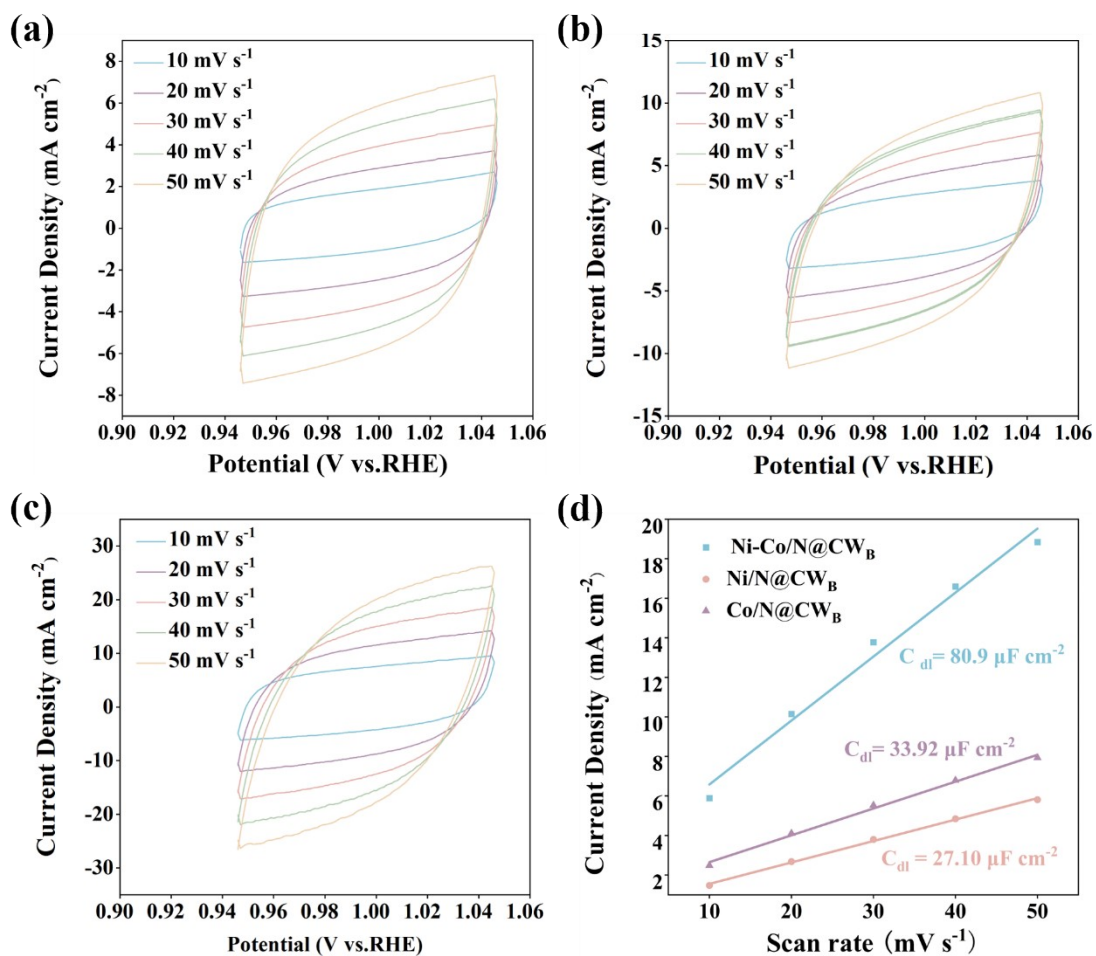

Fig. S11 Cyclic voltammetry (CV) curves measured at different scan rates from 10 to 50 m V s<sup>-1</sup> for (a) Ni/N@CW<sub>B</sub>, (b) Co/N@CW<sub>B</sub> and (c) Ni-Co/N@CW<sub>B</sub>. (d) The double-layer capacitance (C<sub>dl</sub>) plots of Ni/N@CW<sub>B</sub>, Co/N@CW<sub>B</sub> and Ni-Co/N@CW<sub>B</sub>.

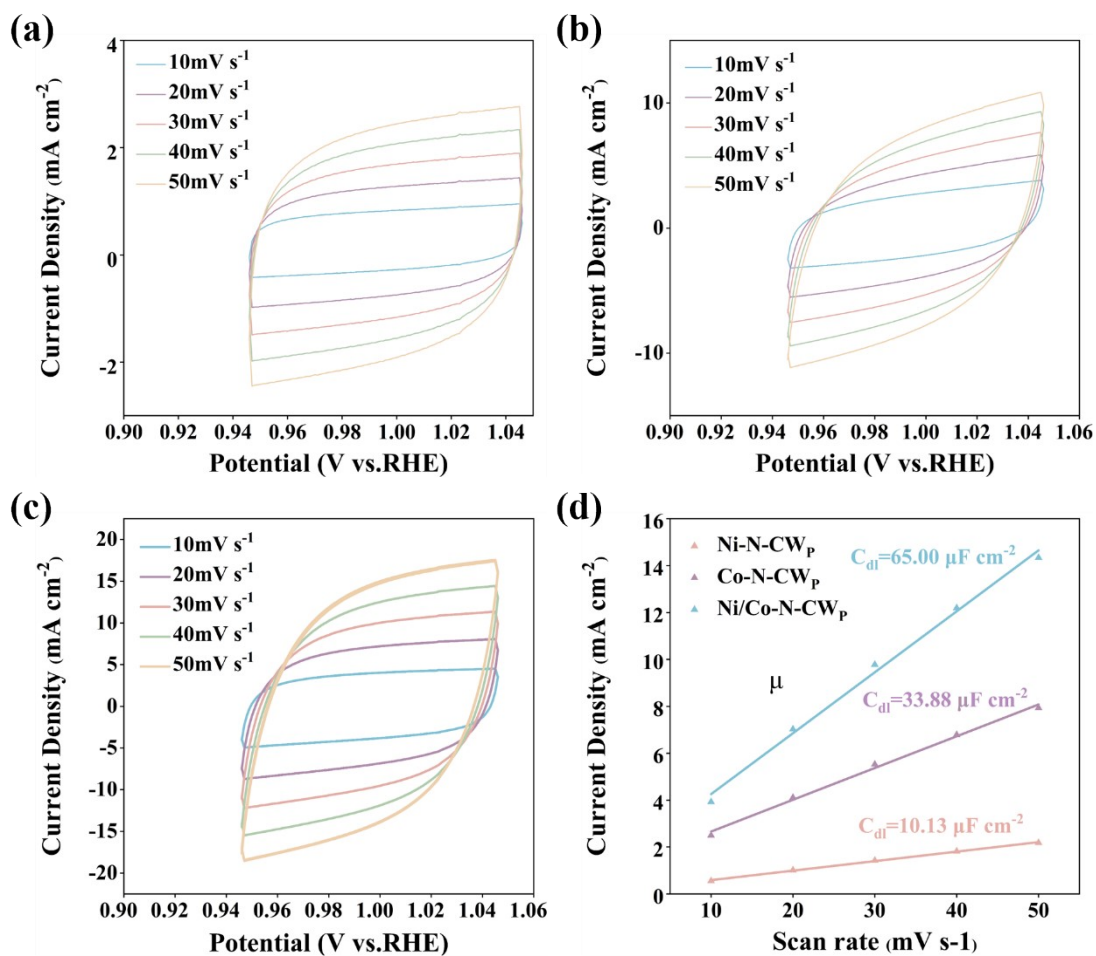

Fig. S12 Cyclic voltammetry (CV) curves measured at different scan rates from 10 to 50 m V s<sup>-1</sup> for (a) Ni/N@CW<sub>p</sub>, (b) Co/N@CW<sub>p</sub> and (c) Ni-Co/N@CW<sub>p</sub>. (d) The double-layer capacitance (C<sub>dl</sub>) plots of Ni/N@CW<sub>p</sub>, Co/N@CW<sub>p</sub>, Ni-Co/N@CW<sub>p</sub>.

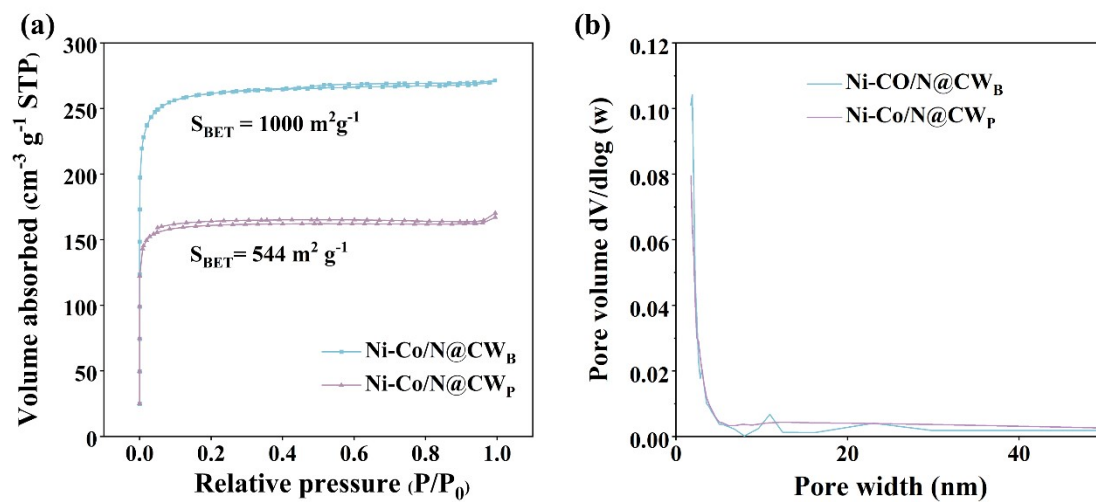

Fig. S13 (a) N<sub>2</sub> adsorption-desorption isotherms of Ni-Co/N@CW<sub>B</sub> and Ni-Co/N@CW<sub>P</sub>. (b) Pore size distribution curves of Ni-Co/N@CW<sub>B</sub> and Ni-Co/N@CW<sub>P</sub>.

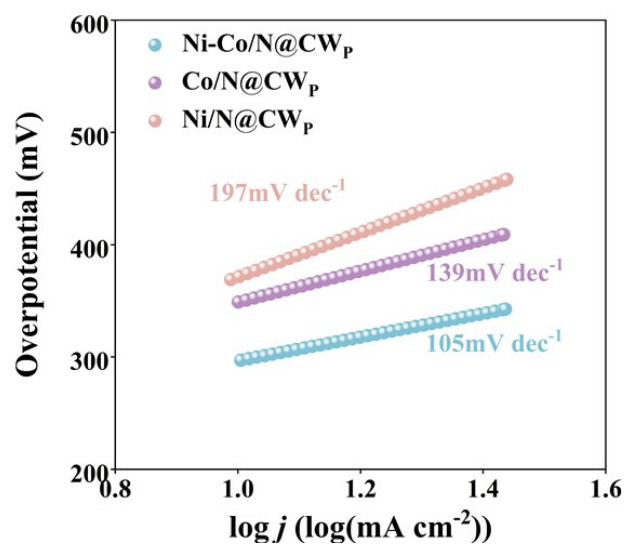

Fig. S14 Tafel plots for OER on Ni-Co/N@CW<sub>p</sub>, Ni/N@CW<sub>p</sub>, and Co/N@CW<sub>p</sub>.

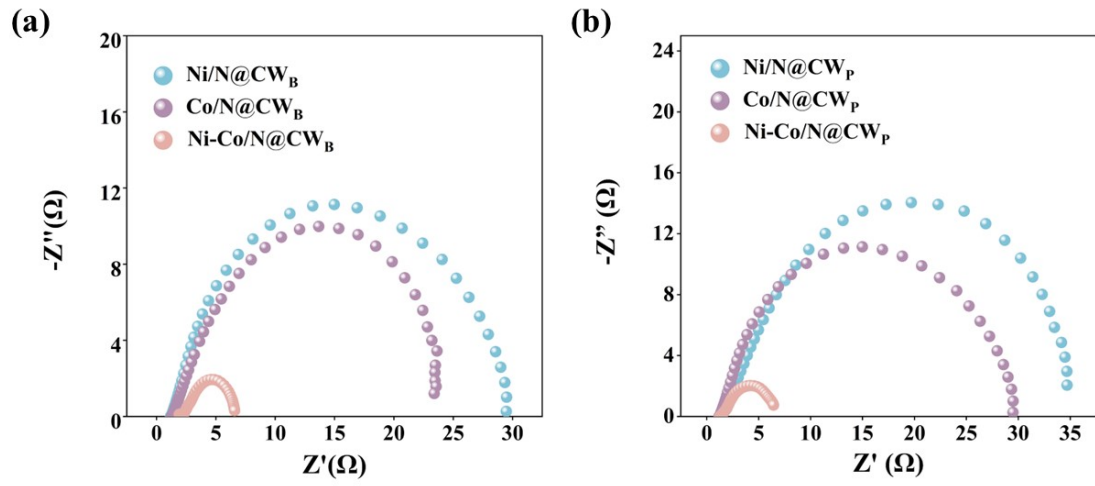

Fig. S15 (a) Nyquist plots of  $\text{Ni/N@CW}_B$ ,  $\text{Co/N@CW}_B$  and  $\text{Ni-Co/N@CW}_B$ . (b) Nyquist plots of  $\text{Ni/N@CW}_P$ ,  $\text{Co/N@CW}_P$  and  $\text{Ni-Co/N@CW}_P$ .



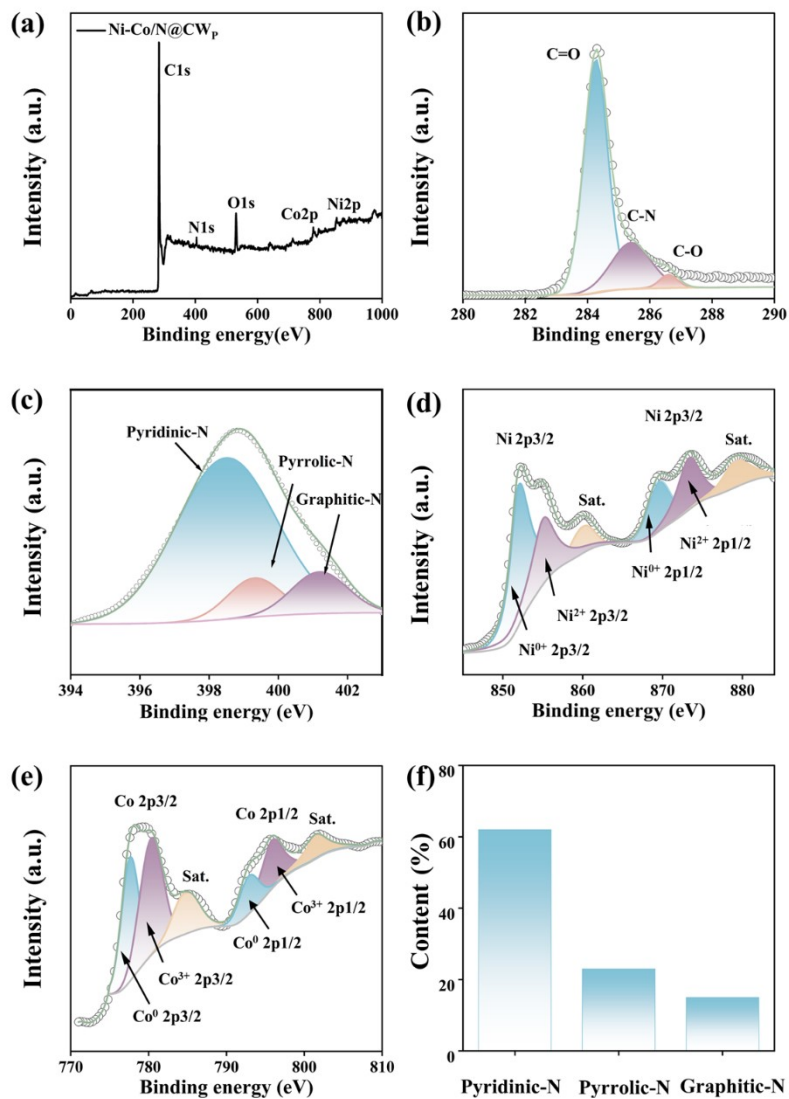

Fig. S16 (a) Survey XPS spectrum of Ni-Co/N@CW<sub>p</sub>. (b) C 1s, (c) N 1s and (d) Ni 2p (e) Co 2p XPS spectra of Ni-Co/N@CW<sub>p</sub>. (f) Percentages of N species obtained by N 1s spectra.

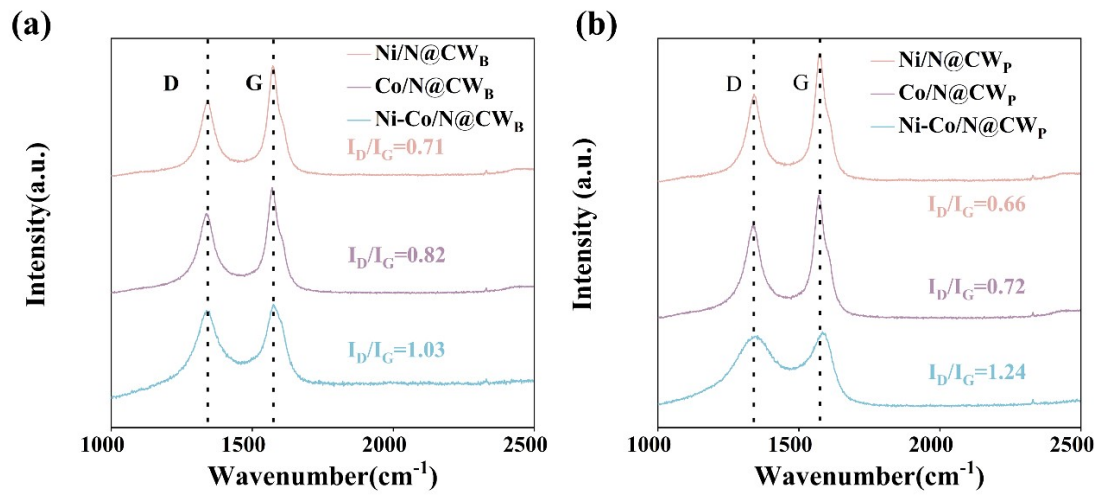

Fig. S17 (a) Raman spectra of Ni/N@CW<sub>B</sub>, Co/N@CW<sub>B</sub> and Ni-Co/N@CW<sub>B</sub>. (b) Raman spectra of Ni/N@CW<sub>P</sub>, Co/N@CW<sub>P</sub> and Ni-Co/N@CW<sub>P</sub>.

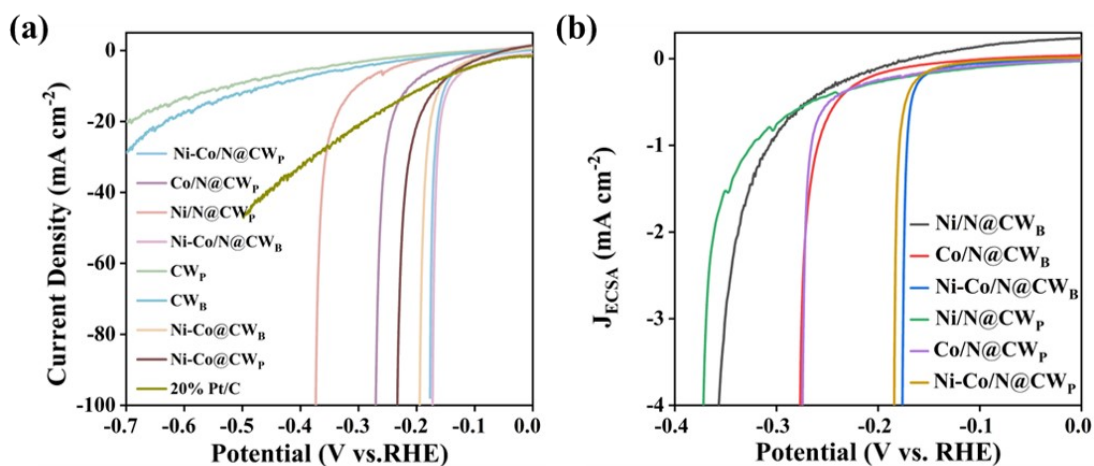

Fig. S18 (a) LSV curves for HER on  $CW_B$ ,  $CW_P$ ,  $Ni/N@CW_B$ ,  $Ni/N@CW_P$ ,  $Co/N@CW_B$ ,  $Co/N@CW_P$ ,  $Ni-Co@CW_B$ ,  $Ni-Co@CW_P$ ,  $Ni-Co/N@CW_B$ ,  $Ni-Co/N@CW_P$ , and  $Pt/C$ . (b) LSV curves for HER on  $Ni/N@CW_B$ ,  $Ni/N@CW_P$ ,  $Co/N@CW_B$ ,  $Co/N@CW_P$ ,  $Ni-Co/N@CW_B$ , and  $Ni-Co/N@CW_P$  by normalizing to the ECSA.

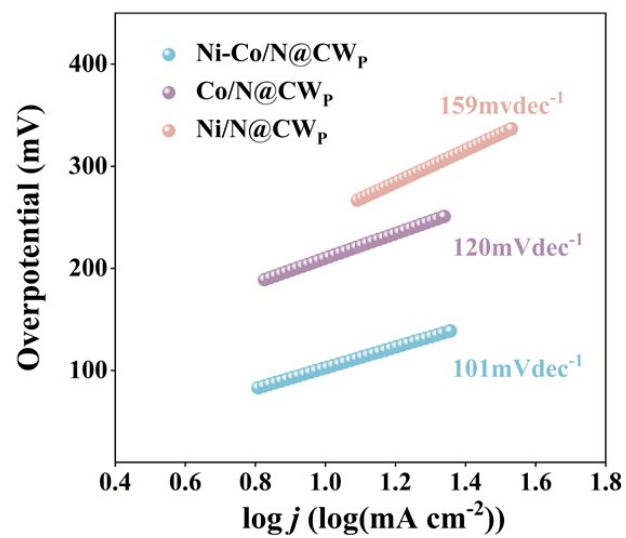

Fig. S19 Tafel plots for HER on Ni-Co/N@CW<sub>p</sub>, Ni/N@CW<sub>p</sub> and Co/N@CW<sub>p</sub>.

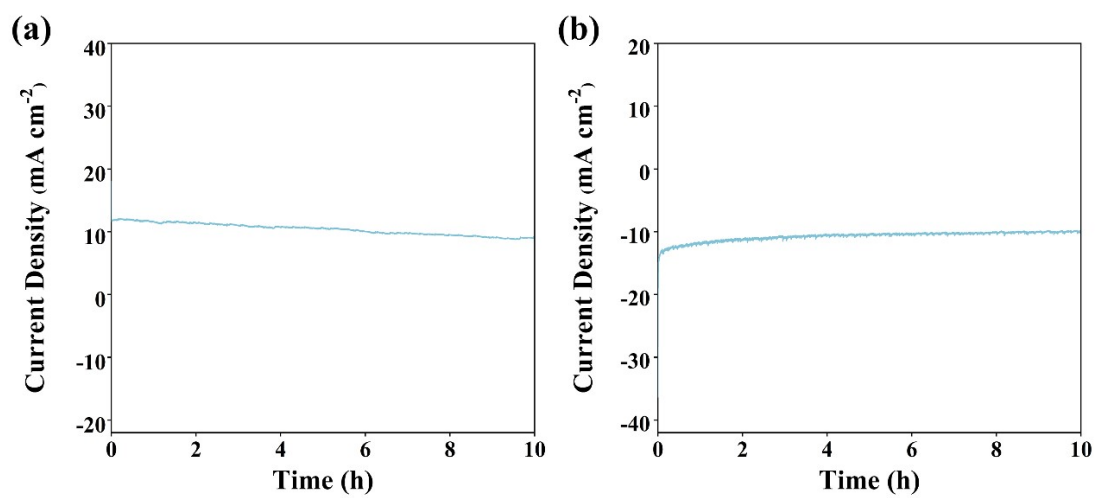

Fig. S20 Chronoamperometric responses for (a) OER and (b) HER of the Ni-Co/N@CW<sub>p</sub>.

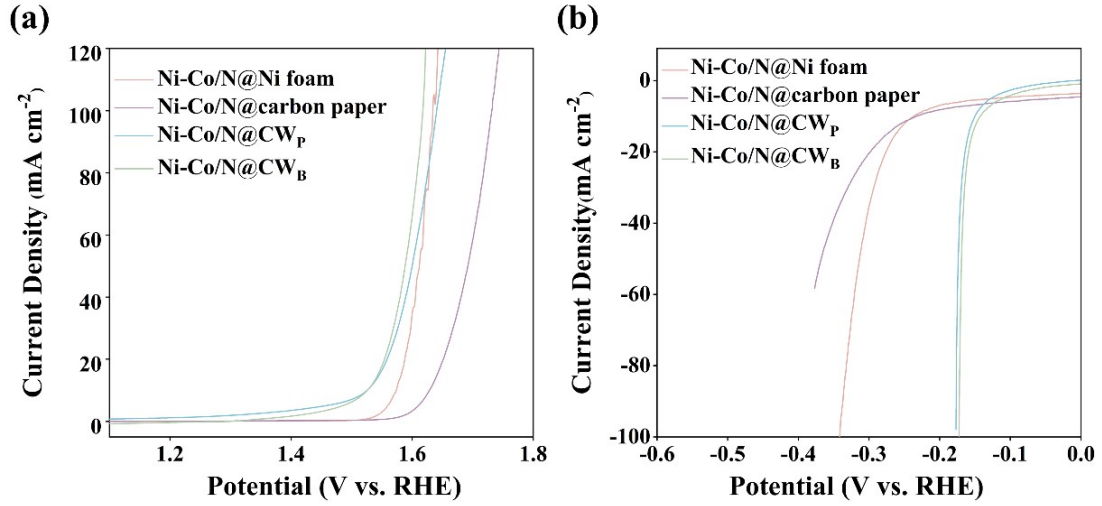

Fig. S21 (a) LSV curves for OER on Ni-Co/N@Ni foam, Ni-Co/N@carbon paper, Ni-Co/N@CW<sub>B</sub> and Ni-Co/N@CW<sub>P</sub>, respectively. (b) LSV curves for HER on Ni-Co/N@Ni foam, Ni-Co/N@carbon paper, Ni-Co/N@CW<sub>B</sub> and Ni-Co/N@CW<sub>P</sub>, respectively.

Table S1. The performance comparison of Ni-Co/N@CW with other reported works.

| <b>Electrocatalysts</b>                                 | <b>Overpotential of HER @10 mA cm<sup>-2</sup> (mV vs. RHE)</b> | <b>Overpotential of OER @10 mA cm<sup>-2</sup> (mV vs. RHE)</b> | <b>Cell voltage @10mA cm<sup>-2</sup> (V vs. RHE)</b> | <b>Electrolyte</b> | <b>Ref.</b> |
|---------------------------------------------------------|-----------------------------------------------------------------|-----------------------------------------------------------------|-------------------------------------------------------|--------------------|-------------|
| <b>Ni-Co/N@CW<sub>B</sub></b>                           | 143                                                             | 290                                                             | 1.60                                                  | 1.0 M KOH          | This work   |
| <b>Ni-Co/N@CW<sub>P</sub></b>                           | 150                                                             | 300                                                             | 1.64                                                  | 1.0 M KOH          | This work   |
| <b>CoNiRu-NT</b>                                        | 22                                                              | 255                                                             | 1.47                                                  | 1.0 M KOH          | 1           |
| <b>Ru-CoV-LDH@NF</b>                                    | 32                                                              | 230                                                             | 1.50                                                  | 1.0 M KOH          | 2           |
| <b>Cu<sub>3</sub>Ag<sub>7</sub>/CF</b>                  | 130                                                             | 289                                                             | 1.99                                                  | 1.0 M KOH          | 3           |
| <b>MoS<sub>2</sub>/NiCo<sub>2</sub>O<sub>4</sub>/NF</b> | 322                                                             | 106                                                             | 1.62                                                  | 1.0 M KOH          | 4           |
| <b>Ni/Ni(OH)<sub>2</sub></b>                            | 77                                                              | 270                                                             | 1.59                                                  | 1.0 M KOH          | 5           |
| <b>Fe-Co-O/Co@NC-mNS/NF</b>                             | 112                                                             | 257                                                             | 1.58                                                  | 1.0 M KOH          | 6           |
| <b>Co<sub>0.42</sub>Fe<sub>0.58</sub>P@C</b>            | 178                                                             | 226                                                             | 1.55                                                  | 1.0 M KOH          | 7           |
| <b>FeCoNiPtRu</b>                                       | 104                                                             | 331                                                             | 1.69                                                  | 1.0 M KOH          | 8           |
| <b>CoPt<sub>3</sub>/a-FCWO-NS</b>                       | 135                                                             | 243                                                             | 1.51                                                  | 1.0 M KOH          | 9           |
| <b>Co-Co<sub>2</sub>C/CC</b>                            | 96                                                              | 261                                                             | 1.63                                                  | 1.0 M KOH          | 10          |
| <b>Mn-NiCoP</b>                                         | 148                                                             | 266                                                             | 1.62                                                  | 1.0 M KOH          | 11          |
| <b>NiP<sub>2</sub>/NiSe<sub>2</sub></b>                 | 89                                                              | 250                                                             | 1.56                                                  | 1.0 M KOH          | 12          |

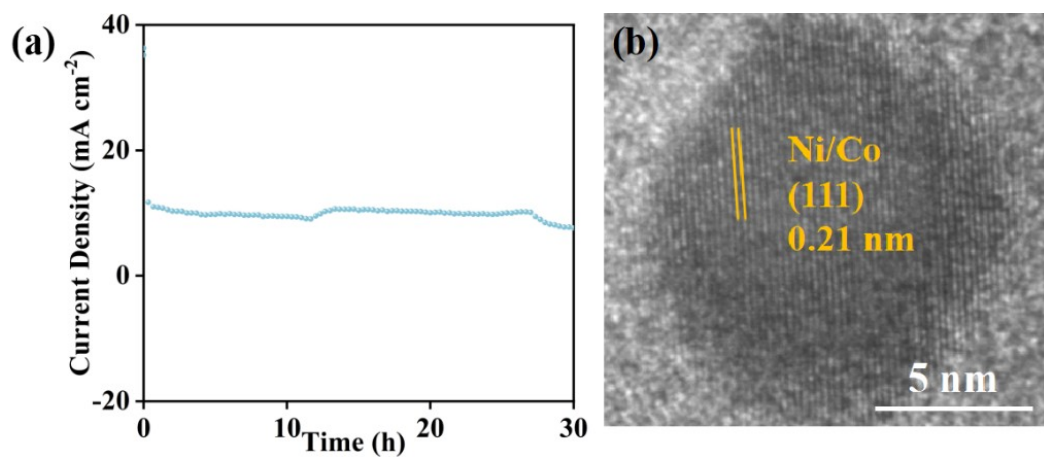

Fig. S22 (a) Chronoamperometric electrolysis in 1.0 M KOH at current density of 10 mA cm<sup>-2</sup> for Ni-Co/N@CW<sub>B</sub> || Ni-Co/N@CW<sub>B</sub> over 30 h. (b) TEM image of Ni-Co/N@CW<sub>B</sub> after water splitting stability test.



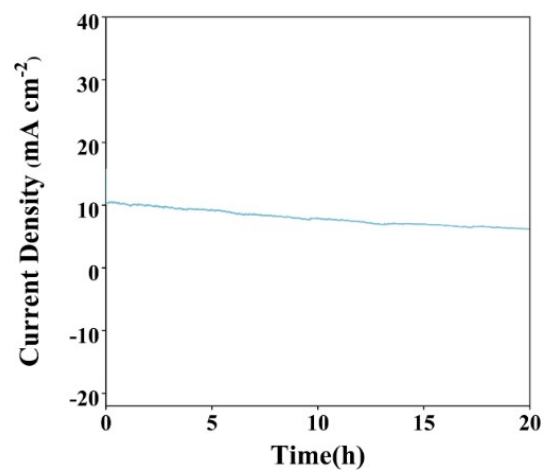

Fig. S23 Chronoamperometric electrolysis in 1.0 M KOH at current density of 10 mA cm<sup>-2</sup> for Ni-Co/N@CW<sub>P</sub> || Ni-Co/N@CW<sub>P</sub> over 20 h.

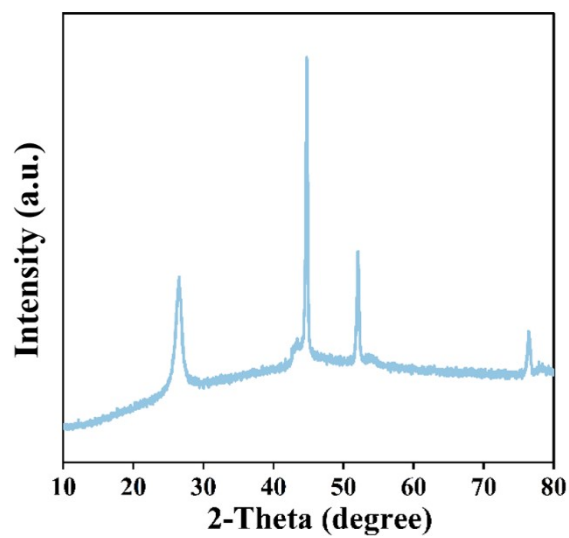

Fig. S24 XRD pattern of Ni-Co/N@CW after OER test.

Table S2. Weight % of metal loading obtained from ICP-OES analysis.

| Sample                                               | ICP-OES  |          |
|------------------------------------------------------|----------|----------|
|                                                      | Ni (wt%) | Co (wt%) |
| Post-reaction electrolyte (Ni-Co/N@CW <sub>B</sub> ) | 0.02     | 0.03     |
| Post-reaction electrolyte (Ni-Co/N@CW <sub>P</sub> ) | 0.03     | 0.05     |

## SI Refences

- [1] W. Ying, W. Shuo, M. Z. Lin, Y. L. Ting, Z. X. Bo, X. Y. Ying, H. J. Min, Y. Xiao, L. S. Ni, Z. Q. Guo, *Adv. Mater.* 34 (2022) 2107488-2107501.
- [2] L. Wei, F. Bomin, Y. Lingya, L. Junying, H. Weihua, *ChemSusChem.* 14 (2020) 730-737.
- [3] K.N. Dinh, Y. Sun, Z. Pei, Z. Yuan, A. Suwardi, Q. Huang, X. Liao, Z. Wang, Y. Chen, Q. Yan, *Small.* 16 (2020) 1905885.
- [4] M. Khairy, K.G. Mahmoud, *J. Alloys. Compound.* 935 (2023) 168056.
- [5] T. Bairui, Y. Le, M. Fengjuan, Z. Yu, C. K. Paul, *J. Phys. Chem.Solids.* 150 (2021) 109842.
- [6] T.I. Singh, G. Rajeshkhanna, U.N. Pan, T. Kshetri, H. Lin, N.H. Kim, J.H. Lee, *Small.* 17 (2021) 2101312.
- [7] Y. Deng, Y. Cao, Y. Xia, X. Xi, Y. Wang, W. Jiang, D. Yang, A. Dong, T. Li, *Adv. Energy Mater.* 12 (2022) 2202394.
- [8] H. Wu, Z. Wang, Z. Li, Y. Ma, F. Ding, F. Li, H. Bian, Q. Zhai, Y. Ren, Y. Shi, *Adv. Energy Mater.* 13 (2023) 2300837.
- [9] Z. Wang, S. Li, G. Zhang, X. Yu, Z. Zhao, Y. Zhang, Y. Shi, H.-B. Zhu, X. Xiao, *Appl. Catal. B Environ.* 342 (2024) 123387.
- [10] P. Wang, J. Zhu, Z. Pu, R. Qin, C. Zhang, D. Chen, Q. Liu, D. Wu, W. Li, S. Liu, *Appl. Catal. B Environ.* 296 (2021) 120334
- [11] G. Ma, J. Ye, M. Qin, T. Sun, W. Tan, Z. Fan, L. Huang, X. Xin, *Nano Energy.* 115 (2023) 108679.
- [12] L. Yang, L. Huang, Y. Yao, L. Jiao, *Appl. Catal. B Environ.* 282 (2021) 119584.
